# Supplementary material for: The Advantages of NGS Molecular Classification in Endometrial Cancer Diagnosis
Source: Preprints.org preprint supplement (doi:10.20944/preprints202307.2092.v1), 2023-07-31
Supplement: Supplementary file 1 [file supplementary]

Table S3 - List of pathogenic variants detected in EC cases

| Sample no. | Genes         | Coding             | Amino Acid Change  | Allele Frequency % | Exon  | Coverage |
|------------|---------------|--------------------|--------------------|--------------------|-------|----------|
| EC-01-A    | <i>TP53</i>   | c.722C>T           | p.(Ser241Phe)      | 67.95              | 7     | 2000     |
| EC-02-A    | <i>TP53</i>   | c.659A>G           | p.(Tyr220Cys)      | 75.4               | 6     | 2000     |
| EC-03-A    | <i>TP53</i>   | c.817C>T           | p.(Arg273Cys)      | 23.85              | 8     | 2000     |
| EC-04-A    | <i>TP53</i>   | c.734G>T           | p.(Gly245Val)      | 76.43              | 7     | 1345     |
| EC-06-A    | <i>TP53</i>   | c.524G>A           | p.(Arg175His)      | 50.35              | 5     | 2000     |
| EC-07-B    | <i>TP53</i>   | c.839G>A           | p.(Arg280Lys)      | 93.1               | 8     | 2000     |
| EC-08-A    | <i>TP53</i>   | c.880G>T           | p.(Glu294*)        | 94.64              | 8     | 1995     |
| EC-09-A    | <i>KRAS</i>   | c.34G>T            | p.(Gly12Cys)       | 49.88              | 2     | 800      |
|            | <i>PTEN</i>   | c.388C>G           | p.(Arg130Gly)      | 32.2               | 5     | 2000     |
|            | <i>TP53</i>   | c.357del           | p.(Lys120Serfs*3)  | 46.71              | 4     | 1989     |
| EC-10-A    | <i>PTEN</i>   | c.101C>G           | p.(Ala34Gly)       | 34.67              | 2     | 597      |
|            | <i>PTEN</i>   | c.384G>C           | p.(Lys128Asn)      | 41.62              | 5     | 1999     |
| EC-11-A    | <i>KRAS</i>   | c.38G>A            | p.(Gly13Asp)       | 10.49              | 2     | 1993     |
|            | <i>PTEN</i>   | c.278A>G           | p.(His93Arg)       | 24.59              | 4     | 732      |
| EC-12-A    | <i>KRAS</i>   | c.35G>T            | p.(Gly12Val)       | 37.42              | 2     | 1900     |
|            | <i>PTEN</i>   | c.302T>C           | p.(Ile101Thr)      | 22.59              | 5     | 580      |
| EC-13-B    | <i>TP53</i>   | c.578A>G           | p.(His193Arg)      | 80.85              | 6     | 1608     |
| EC-14-A    | <i>PTEN</i>   | c.380_389delinsTAA | p.(Gly127Valfs*5)  | 57.51              | 5     | 1977     |
| EC-15-B2   | <i>POLE</i>   | c.1231G>C          | p.(Val411Leu)      | 12.95              | 13    | 1429     |
|            | <i>MLH1</i>   | c.1103C>A          | p.(Ser368*)        | 9.73               | 12    | 1141     |
| EC-16-A    | <i>MSH2</i>   | c.832G>T           | p.(Glu278*)        | 29.47              | 5     | 1758     |
|            | <i>POLE</i>   | c.890C>T           | p.(Ser297Phe)      | 25.95              | 9     | 1549     |
|            | <i>PTEN</i>   | c.517C>T           | p.(Arg173Cys)      | 26.6               | 6     | 2000     |
|            | <i>PTEN</i>   | c.895G>T           | p.(Glu299*)        | 25.04              | 8     | 1997     |
| EC-17-B    | <i>PTEN</i>   | c.509G>T           | p.(Ser170Ile)      | 25.61              | 6     | 1999     |
|            | <i>PTEN</i>   | c.697C>T           | p.(Arg233*)        | 13.7               | 7     | 2000     |
| EC-18-B    | <i>CTNNB1</i> | c.98C>G            | p.(Ser33Cys)       | 13.56              | 3     | 1999     |
|            | <i>PTEN</i>   | c.389G>A           | p.(Arg130Gln)      | 12.96              | 5     | 1999     |
| EC-19-B    | <i>KRAS</i>   | c.35G>A            | p.(Gly12Asp)       | 8.54               | 2     | 773      |
|            | <i>MSH6</i>   | c.1483C>T          | p.(Arg495*)        | 6.35               | 4     | 788      |
| EC-21-A    | <i>PTEN</i>   | c.37A>C            | p.(Lys13Gln)       | 25.69              | 1     | 1997     |
|            | <i>PTEN</i>   | c.365T>A           | p.(Ile122Asn)      | 15.39              | 5     | 1995     |
| EC-22-B    | <i>PTEN</i>   | c.389G>A           | p.(Arg130Gln)      | 29.84              | 5     | 1535     |
|            | <i>PTEN</i>   | c.955_958del       | p.(Thr319*)        | 46.5               | 8     | 1757     |
| EC-23-B    | <i>PTEN</i>   | c.202T>C           | p.(Tyr68His)       | 18.58              | 3     | 1012     |
|            | <i>PTEN</i>   | c.389G>C           | p.(Arg130Pro)      | 17.55              | 5     | 2000     |
| EC-24-B    | <i>CTNNB1</i> | c.110C>G           | p.(Ser37Cys)       | 7.65               | 3     | 2000     |
|            | <i>PTEN</i>   | c.434_435insC      | p.(Leu146Phefs*34) | 23.43              | 5     | 1989     |
| EC-25-A    | <i>MSH6</i>   | c.457+1G>A         | p.(?)              | 8.34               | 2     | 1703     |
|            | <i>MSH6</i>   | c.3132C>G          | p.(Tyr1044*)       | 14.63              | 4     | 1032     |
| EC-26-A    | <i>PTEN</i>   | c.377C>A           | p.(Ala126Asp)      | 21.95              | 5     | 2000     |
| EC-27-A    | <i>PTEN</i>   | c.388C>T           | p.(Arg130*)        | 25                 | 5     | 2000     |
|            | <i>PTEN</i>   | c.517C>T           | p.(Arg173Cys)      | 26.4               | 6     | 2000     |
|            | <i>PTEN</i>   | c.741dup           | p.(Pro248Thrfs*5)  | 27.62              | 7     | 1988     |
| EC-28-B    | <i>KRAS</i>   | c.35G>T            | p.(Gly12Val)       | 42.71              | 2     | 1997     |
|            | <i>MSH2</i>   | c.1077A>T          | p.(Arg359Ser)      | 81.46              | 7     | 1305     |
|            | <i>MSH6</i>   | c.377C>A           | p.(Ser126*)        | 25.8               | 2     | 2000     |
| EC-30-B    | <i>KRAS</i>   | c.35G>A            | p.(Gly12Asp)       | 16.32              | 2     | 1992     |
| EC-31-A    | <i>PTEN</i>   | c.461del           | p.(Phe154Serfs*5)  | 32.45              | 5     | 829      |
|            | <i>PTEN</i>   | c.940G>T           | p.(Glu314*)        | 30.65              | 8     | 2000     |
| EC-32-A    | <i>KRAS</i>   | c.35G>T            | p.(Gly12Val)       | 30.95              | 2     | 1554     |
|            | <i>PTEN</i>   | c.388C>G           | p.(Arg130Gly)      | 59.6               | 5     | 2000     |
| EC-33-A    | <i>MSH2</i>   | c.2634+1G>T        | p.(?)              | 6.87               | IVS15 | 772      |
|            | <i>MSH6</i>   | c.2731C>T          | p.(Arg911*)        | 10.37              | 4     | 1379     |
|            | <i>TP53</i>   | c.473G>A           | p.(Arg158His)      | 6.39               | 5     | 1580     |
| EC-34-A    | <i>PMS2</i>   | c.400C>T           | p.(Arg134*)        | 6.77               | 5     | 1492     |
|            | <i>PTEN</i>   | c.198G>T           | p.(Lys66Asn)       | 5.25               | 3     | 2000     |
|            | <i>PTEN</i>   | c.1038C>A          | p.(Tyr346*)        | 5.06               | 9     | 1482     |
| EC-35-A    | <i>PTEN</i>   | c.367C>G           | p.(His123Asp)      | 39.1               | 5     | 2000     |
| EC-36-A    | <i>POLE</i>   | c.1231G>T          | p.(Val411Leu)      | 19.9               | 13    | 2000     |
|            | <i>PTEN</i>   | c.389G>A           | p.(Arg130Gln)      | 14.65              | 5     | 2000     |
|            | <i>PTEN</i>   | c.414T>G           | p.(Tyr138*)        | 9.65               | 5     | 2000     |
| EC-37-A    | <i>PTEN</i>   | c.334C>G           | p.(Leu112Val)      | 27.63              | 5     | 1987     |
|            | <i>PTEN</i>   | c.388C>G           | p.(Arg130Gly)      | 39.9               | 5     | 2000     |
| EC-38-A    | <i>CTNNB1</i> | c.109T>G           | p.(Thr41Ile)       | 5.7                | 3     | 2000     |
|            | <i>CTNNB1</i> | c.122C>T           | p.(Thr41Ile)       | 21.45              | 3     | 2000     |
|            | <i>POLE</i>   | c.1231G>T          | p.(Val411Leu)      | 35.15              | 13    | 2000     |
|            | <i>PTEN</i>   | c.17A>C            | p.(Lys6Thr)        | 39.85              | 1     | 5283     |
|            |               |                    |                    |                    |       |          |

|         |               |              |                   |       |    |      |
|---------|---------------|--------------|-------------------|-------|----|------|
| EC-39-A | <i>PTEN</i>   | c.176C>A     | p.(Ser59*)        | 30.20 | 3  | 1606 |
|         | <i>PTEN</i>   | c.389G>A     | p.(Arg130Gln)     | 36.3  | 5  | 2000 |
|         | <i>KRAS</i>   | c.35G>T      | p.(Gly12Val)      | 12.59 | 2  | 1104 |
| EC-40-A | <i>PTEN</i>   | c.955_958del | p.(Thr319*)       | 29.79 | 8  | 1974 |
|         | <i>KRAS</i>   | c.35G>C      | p.(Gly12Ala)      | 17.37 | 2  | 616  |
| EC-41-A | <i>PTEN</i>   | c.389G>A     | p.(Arg130Gln)     | 30.1  | 5  | 2000 |
|         | <i>CTNNB1</i> | c.122C>T     | p.(Thr41Ile)      | 37.11 | 3  | 1905 |
| EC-42-A | <i>MSH6</i>   | c.829G>T     | p.(Glu277*)       | 17.50 | 4  | 2000 |
|         | <i>MSH6</i>   | c.2836G>T    | p.(Glu946*)       | 11.05 | 4  | 2000 |
|         | <i>POLE</i>   | c.1331T>A    | p.(Met444Lys)     | 29.83 | 13 | 1998 |
|         | <i>PTEN</i>   | c.19G>T      | p.(Glu7*)         | 30.62 | 1  | 1992 |
|         | <i>PTEN</i>   | c.517C>T     | p.(Arg173Cys)     | 12.56 | 6  | 1999 |
|         | <i>PTEN</i>   | c.675T>G     | p.(Tyr225*)       | 16.06 | 7  | 1999 |
|         | <i>KRAS</i>   | c.520G>T     | p.(Glu174*)       | 10.38 | 5  | 713  |
| EC-43-A | <i>MSH2</i>   | c.1738G>T    | p.(Glu580*)       | 18.02 | 11 | 1998 |
|         | <i>POLE</i>   | c.857C>G     | p.(Pro286Arg)     | 17.45 | 9  | 2000 |
|         | <i>PTEN</i>   | c.38A>C      | p.(Lys13Thr)      | 7.53  | 1  | 3417 |
|         | <i>PTEN</i>   | c.185A>C     | p.(Lys62Thr)      | 13.76 | 3  | 1999 |
|         | <i>PTEN</i>   | c.389G>A     | p.(Arg130Gln)     | 18.81 | 5  | 1999 |
|         | <i>PTEN</i>   | c.518G>A     | p.(Arg173His)     | 9.4   | 6  | 2000 |
|         | <i>RAD51C</i> | c.364G>T     | p.(Glu122*)       | 11.2  | 2  | 2000 |
| EC-45-A | <i>PTEN</i>   | c.697C>T     | p.(Arg233*)       | 45.25 | 7  | 2000 |
|         | <i>TP53</i>   | c.96+1G>C    | p.(?)             | 34.66 | 3  | 1108 |
| EC-49-A | <i>POLE</i>   | c.1231G>T    | p.(Val411Leu)     | 12.35 | 13 | 2000 |
|         | <i>PTEN</i>   | c.389G>A     | p.(Arg130Gln)     | 25.15 | 5  | 2000 |
| EC-50-C | <i>TP53</i>   | c.796G>A     | p.(Gly266Arg)     | 18.25 | 8  | 2844 |
| EC-51-A | <i>TP53</i>   | c.524G>A     | p.(Arg175His)     | 42.7  | 5  | 2000 |
| EC-52-A | <i>TP53</i>   | c.472C>G     | p.(Arg158Gly)     | 78.05 | 5  | 2000 |
| EC-53-A | <i>TP53</i>   | c.844C>T     | p.(Arg282Trp)     | 29.35 | 8  | 2000 |
| EC-54-A | <i>TP53</i>   | c.659A>G     | p.(Tyr220Cys)     | 70.96 | 6  | 1632 |
| EC-55-A | <i>TP53</i>   | c.746G>T     | p.(Arg249Met)     | 15.25 | 7  | 2000 |
| EC-56-A | <i>KRAS</i>   | c.40G>A      | p.(Val14Ile)      | 5.64  | 2  | 780  |
|         | <i>TP53</i>   | c.817C>T     | p.(Arg273Cys)     | 55.15 | 8  | 2000 |
| EC-57-A | <i>PTEN</i>   | c.138C>G     | p.(Tyr46*)        | 7.85  | 2  | 1999 |
|         | <i>PTEN</i>   | c.388C>G     | p.(Arg130Gly)     | 7.75  | 5  | 2000 |
| EC-58-A | <i>PTEN</i>   | c.287C>T     | p.(Pro96Leu)      | 23.85 | 5  | 2000 |
|         | <i>PTEN</i>   | c.389G>A     | p.(Arg130Gln)     | 36.7  | 5  | 2000 |
|         | <i>TP53</i>   | c.734G>A     | p.(Gly245Asp)     | 29.15 | 7  | 2000 |
| EC-59-A | <i>PTEN</i>   | c.71A>G      | p.(Asp24Gly)      | 15.86 | 1  | 1955 |
|         | <i>PTEN</i>   | c.388C>G     | p.(Arg130Gly)     | 21.63 | 5  | 1595 |
| EC-60-A | <i>CTNNB1</i> | c.134C>T     | p.(Ser45Phe)      | 16.14 | 3  | 1623 |
|         | <i>PTEN</i>   | c.74_75insT  | p.(Leu25Phefs*19) | 11.62 | 1  | 1988 |
|         | <i>PTEN</i>   | c.388C>T     | p.(Arg130*)       | 16.8  | 5  | 2000 |
| EC-61-A | <i>POLE</i>   | c.1231G>C    | p.(Val411Leu)     | 11.96 | 13 | 1998 |
|         | <i>TP53</i>   | c.541C>T     | p.(Arg181Cys)     | 9.04  | 5  | 1902 |
| EC-62-A | <i>BRIPI</i>  | c.1741C>T    | p.(Arg581*)       | 52.38 | 12 | 1999 |
|         | <i>CTNNB1</i> | c.122C>T     | p.(Thr41Ile)      | 9.5   | 3  | 2000 |
|         | <i>PTEN</i>   | c.388C>G     | p.(Arg130Gly)     | 24.1  | 5  | 2000 |
| EC-63-A | <i>PTEN</i>   | c.860C>G     | p.(Ser287*)       | 7.5   | 8  | 2000 |
| EC-64-A | <i>CTNNB1</i> | c.101G>A     | p.(Gly34Glu)      | 11.5  | 3  | 2000 |
