# Supplementary material for: The Advantages of NGS Molecular Classification in Endometrial Cancer Diagnosis
Source: Preprints.org preprint supplement (doi:10.20944/preprints202307.2092.v1), 2023-07-31
Supplement: Supplementary file 2 [file supplementary]

Table S1 - Quality parameters of the 63 EC specimen

| Sample no. | Histology no.     | Tumor cell content [%] | DNA concentration [ng/μl] | DIN |
|------------|-------------------|------------------------|---------------------------|-----|
| EC-01-A    | 10027-2020/C4     | 70%                    | 46.7                      | 3.4 |
| EC-02-A    | 6457-2020/B2      | 40%                    | 9.45                      | 2.4 |
| EC-03-A    | 5609-2020/C9      | 70%                    | 28.7                      | 2.8 |
| EC-04-A    | 15121-2019/B39    | 60%                    | 8.95                      | 2.0 |
| EC-05-A    | 7754-2019/D1      | 80%                    | 3.41                      | 3.1 |
| EC-06-A    | 7082-2019/A2      | 60%                    | 2.66                      | 2.1 |
| EC-07-B    | 6524-2019/D23     | 90%                    | 6.47                      | 2.5 |
| EC-08-A    | 261-2018/1-10     | 80%                    | 50.0                      | 2.9 |
| EC-09-A    | 3388/18-A11.1     | 70%                    | 17.7                      | 2.0 |
| EC-10-A    | 4425/18-A4.1      | 60%                    | 5.21                      | 2.5 |
| EC-11-A    | 19204/18-A18.1    | 30%                    | 47.5                      | 4.8 |
| EC-12-A    | 6001/19-11.1      | 45%                    | 15.2                      | 2.4 |
| EC-13-B    | 6776/19-E3.1      | 70%                    | 8.78                      | 2.7 |
| EC-14-A    | 15425/19-C2.1     | 70%                    | 10.1                      | 2.1 |
| EC-15-B2   | 18824/19-C10.1    | 50%                    | 6.43                      | 2.7 |
| EC-16-A    | 20497/19-C8.1     | 55%                    | 39.4                      | 4.8 |
| EC-17-B    | 2087/18-1.9       | 60%                    | 27.9                      | 3.0 |
| EC-18-B    | 10114/18-A12      | 80%                    | 12.7                      | 3.0 |
| EC-19-B    | 19460/18-A10      | 50%                    | 17.9                      | 2.3 |
| EC-20-A    | 20484/18-A21      | 70%                    | 22.8                      | 2.2 |
| EC-21-A    | 26867/19-C28      | 70%                    | 2.88                      | 2.2 |
| EC-22-B    | 5285/19-A17       | 50%                    | 4.01                      | 2.0 |
| EC-23-B    | 6312/19-A6        | 35%                    | 9.38                      | 2.7 |
| EC-24-B    | 13138/19-A11      | 35%                    | 7.82                      | 3.7 |
| EC-25-A    | 15249/19-C5       | 60%                    | 13.8                      | 2.4 |
| EC-26-A    | 18109/19-A11      | 60%                    | 9.71                      | 3.0 |
| EC-27-A    | 24322/19-A7       | 50%                    | 29.5                      | 2.2 |
| EC-28-B    | 24747-19/A7       | 60%                    | 16.1                      | 3.2 |
| EC-30-B    | 6362/20-A7        | 70%                    | 25.1                      | 3.5 |
| EC-31-A    | 17567/20-C9       | 70%                    | 26.5                      | 2.4 |
| EC-32-A    | 11350/20-C2       | 65%                    | 21.9                      | 4.4 |
| EC-33-A    | 1112/1-1.15       | 70%                    | 67.2                      | 2.2 |
| EC-34-A    | 008848/18-A10     | 60%                    | 43.9                      | 2.1 |
| EC-35-A    | 015945/18-A15     | 50%                    | 56.0                      | 2.1 |
| EC-36-A    | 018894/19-C8      | 80%                    | 55.2                      | 2.2 |
| EC-37-A    | 020159/19-A11     | 80%                    | 60.0                      | 2.2 |
| EC-38-A    | 022633/18-A9      | 70%                    | 5.08                      | 2.4 |
| EC-39-A    | 015848/19-A6      | 60%                    | 23.3                      | 3.2 |
| EC-40-A    | 001858/19-A9      | 50%                    | 31.3                      | 2.4 |
| EC-41-A    | 2020/011373 B8 1  | 70%                    | 55.0                      | 2.2 |
| EC-42-A    | 2019/024820 A8 1  | 40%                    | 54.0                      | 2.4 |
| EC-43-A    | 2020/006644 D1 1  | 60%                    | 58.0                      | 2.3 |
| EC-44-A    | 2020/004135 A9 1  | 35%                    | 53.0                      | 2.5 |
| EC-45-A    | 2020/006048 C21 1 | 50%                    | 40.7                      | 2.6 |
| EC-49-A    | 2021-i00405       | 40%                    | 49.2                      | 2.5 |
| EC-50-C    | 2021-I012659      | 65%                    | 18.8                      | 3.8 |
| EC-51-A    | 2021-I016651      | 80%                    | 44.3                      | 2.7 |
| EC-52-A    | 2021-I021925      | 60%                    | 37.6                      | 3.4 |
| EC-53-A    | PRF508270.01      | 70%                    | 46.6                      | 2.1 |
| EC-54-A    | 2021-I021215      | 70%                    | 46.5                      | 3.2 |
| EC-55-A    | 24452-17          | 80%                    | 48.3                      | 2.6 |
| EC-56-A    | 29324-17          | 70%                    | 23.5                      | 2.4 |
| EC-57-A    | 2019-I007330      | 50%                    | 37.6                      | 3.0 |
| EC-58-A    | 2020-I001747      | 55%                    | 35.4                      | 2.8 |
| EC-59-A    | 2018-I003824      | 60%                    | 19.4                      | 2.5 |
| EC-60-A    | 2020-YR000002     | 70%                    | 26.2                      | 2.6 |
| EC-61-A    | 2020-I016159      | 70%                    | 34.8                      | 2.4 |
| EC-62-A    | 2020-I014923      | 50%                    | 44.9                      | 3.4 |
| EC-63-A    | 2020-I020069      | 50%                    | 7.45                      | 2.9 |
| EC-64-A    | 2020-I009004      | 60%                    | 81.2                      | 2.0 |
