# Supplementary material for: The Advantages of NGS Molecular Classification in Endometrial Cancer Diagnosis
Source: Preprints.org preprint supplement (doi:10.20944/preprints202307.2092.v1), 2023-07-31
Supplement: Supplementary file 3 [file supplementary]

Table S5 - Risk profiles according to histopathological and morphological features of EC

| Histogroups | Risk profile (molecular class unknown) |             |                          |                     |            | Total |
|-------------|----------------------------------------|-------------|--------------------------|---------------------|------------|-------|
|             | <i>advanced-metastatic</i>             | <i>high</i> | <i>high-intermediate</i> | <i>intermediate</i> | <i>low</i> |       |
| LGEC        | 0                                      | 1           | 4                        | 10                  | 16         | 31    |
| HGEC        | 0                                      | 5           | 4                        | 4                   | 0          | 13    |
| OHEC        | 2                                      | 14          | 0                        | 0                   | 0          | 16    |
| Total       | 2                                      | 20          | 8                        | 14                  | 16         | 60    |

Chi-squared: 53,2851  
Degrees of Freedom: 8  
Significance level: p< 0.0001
