# Supplementary material for: The Advantages of NGS Molecular Classification in Endometrial Cancer Diagnosis
Source: Preprints.org preprint supplement (doi:10.20944/preprints202307.2092.v1), 2023-07-31
Supplement: Supplementary file 4 [file supplementary]

Table S6 - Risk profiles according to molecular classification of EC

| Histogroups  | Risk profile (molecular class known) |             |                               |                     |            |
|--------------|--------------------------------------|-------------|-------------------------------|---------------------|------------|
|              | <i>advanced-<br/>metastatic</i>      | <i>high</i> | <i>high-<br/>intermediate</i> | <i>intermediate</i> | <i>low</i> |
| LGEC         | 0                                    | 2           | 3                             | 10                  | 16         |
| HGEC         | 0                                    | 7           | 1                             | 2                   | 3          |
| OHEC         | 2                                    | 12          | 0                             | 1                   | 1          |
| <i>Total</i> | <i>2</i>                             | <i>21</i>   | <i>4</i>                      | <i>13</i>           | <i>20</i>  |

Chi-squared: 33,4964  
Degrees of Freedom: 8  
Significance level: p=0.0001

---

*Total*

---

*31*

*13*

*16*

**60**

---
