# Supplementary material for: The Advantages of NGS Molecular Classification in Endometrial Cancer Diagnosis
Source: Preprints.org preprint supplement (doi:10.20944/preprints202307.2092.v1), 2023-07-31
Supplement: Supplementary file 5 [file supplementary]

**Table S4 - Recurrent pathogenic variants identified in the 60 EC cases analyzed by NGS**

| Gene   | Pathogenic variants                                              |
|--------|------------------------------------------------------------------|
| CTNNB1 | c.122C>T                                                         |
| KRAS   | c.35G>A-C-T                                                      |
| POLE   | c.857C>G<br>c.1231G>C-T                                          |
| PTEN   | c.388C>G-T<br>c.389G>A-C<br>c.517C>T<br>c.697C>T<br>c.955_958del |
| TP53   | c.524A>G<br>c.659A>G<br>c.817C>T                                 |
