# Supplementary material for: The Advantages of NGS Molecular Classification in Endometrial Cancer Diagnosis
Source: Preprints.org preprint supplement (doi:10.20944/preprints202307.2092.v1), 2023-07-31
Supplement: Supplementary file 6 [file supplementary]

**Table S7 - Concordance between TP53 molecular findings and IHC analysis**

|               | <i>TP53</i> molecular profile | IHC       |
|---------------|-------------------------------|-----------|
| <b>EC-050</b> | Wild-type                     | Aberrant  |
| <b>EC-058</b> | c.743G>A; p.(Gly245Asp)       | Wild-type |
