# Supplementary material for: The Advantages of NGS Molecular Classification in Endometrial Cancer Diagnosis
Source: Preprints.org preprint supplement (doi:10.20944/preprints202307.2092.v1), 2023-07-31
Supplement: Supplementary file 7 [file supplementary]

Table S2 - Sequencing metrics and alignment quality of the NGS runs

|                            | run 1      | run 2      | run 3      | run 4      |        |         |        |        |         |        |        |         |
|----------------------------|------------|------------|------------|------------|--------|---------|--------|--------|---------|--------|--------|---------|
| total reads                | 24,188,008 | 24,335,061 | 22,236,676 | 22,705,820 |        |         |        |        |         |        |        |         |
| polyclonal                 | 26%        | 24%        | 29%        | 32%        |        |         |        |        |         |        |        |         |
| final library              | 92%        | 92%        | 91%        | 95%        |        |         |        |        |         |        |        |         |
| median read length bp      | 128        | 129        | 126        | 128        |        |         |        |        |         |        |        |         |
| aligned bases              | 99%        | 99%        | 100%       | 99%        |        |         |        |        |         |        |        |         |
| unaligned bases            | 1%         | 1%         | 0%         | 1%         |        |         |        |        |         |        |        |         |
| mean raw accuracy 1X       | 99.6%      | 99.6%      | 99.6%      | 99.6%      |        |         |        |        |         |        |        |         |
|                            | run 1      |            |            | run 2      |        |         | run 3  |        |         | run 4  |        |         |
|                            | AQ17       | AQ20       | Perfect    | AQ17       | AQ20   | Perfect | AQ17   | AQ20   | Perfect | AQ17   | AQ20   | Perfect |
| Total Number of Bases [bp] | 2.79 G     | 2.69 G     | 2.41 G     | 2.85 G     | 2.75 G | 2.47 G  | 2.57 G | 2.47 G | 2.22 G  | 2.67 G | 2.54 G | 2.22 G  |
| Mean Length [bp]           | 121        | 119        | 110        | 123        | 121    | 112     | 119    | 117    | 109     | 122    | 119    | 108     |
| Longest Alignment [bp]     | 355        | 354        | 340        | 370        | 370    | 344     | 358    | 358    | 322     | 361    | 361    | 339     |
| Mean Coverage Depth [x]    | 0.9        | 0.9        | 0.8        | 0.9        | 0.9    | 0.8     | 0.8    | 0.8    | 0.7     | 0.9    | 0.8    | 0.7     |
